# Supplementary material for: Nutritional Interventions during Chemotherapy for Pancreatic Cancer: A Systematic Review of Prospective Studies
Source: MDPI journal article supplement (doi:10.3390/nu15030727), 2023-02-01
Supplement: s1 [file s1]

**Table S2:** Full search strategies for electronic databases.

|                        |                                                                                                                                                                                                                                                                                                                                                                                                                                                                                                                                                                                                                                                                              |                |
|------------------------|------------------------------------------------------------------------------------------------------------------------------------------------------------------------------------------------------------------------------------------------------------------------------------------------------------------------------------------------------------------------------------------------------------------------------------------------------------------------------------------------------------------------------------------------------------------------------------------------------------------------------------------------------------------------------|----------------|
| <b>Database</b>        | <b>PUBMED</b>                                                                                                                                                                                                                                                                                                                                                                                                                                                                                                                                                                                                                                                                |                |
| <b>Date</b>            | <b>02 12 22</b>                                                                                                                                                                                                                                                                                                                                                                                                                                                                                                                                                                                                                                                              |                |
| <b>Search strategy</b> |                                                                                                                                                                                                                                                                                                                                                                                                                                                                                                                                                                                                                                                                              | <b>Results</b> |
| <b>#1</b>              | diet*[TextWord] OR diet therapy[MeSHTerms] OR therapy nutrition[MeSHTerms] OR eat*[TextWord] OR food*[TextWord] OR feed*[TextWord] OR meal*[TextWord] OR nutriment*[TextWord] or nutritional advice*[TextWord] OR nutritional counseling*[TextWord] OR nutritional support*[TextWord] OR nutritional intervention*[TextWord]                                                                                                                                                                                                                                                                                                                                                 | 2,642,584      |
| <b>#2</b>              | cancer*[TextWord] OR oncology [TextWord] OR tumour*[TextWord] OR tumor*[TextWord] OR malignan*[TextWord] OR carcinoma [TextWord] OR neoplasm*[TextWord]                                                                                                                                                                                                                                                                                                                                                                                                                                                                                                                      | 5,535,398      |
| <b>#3</b>              | pancreas [MeSHTerms] OR pancreatic* [TextWord]                                                                                                                                                                                                                                                                                                                                                                                                                                                                                                                                                                                                                               | 366,604        |
| <b>#4</b>              | #2 AND #3                                                                                                                                                                                                                                                                                                                                                                                                                                                                                                                                                                                                                                                                    | 168,626        |
| <b>#5</b>              | #1 AND #4                                                                                                                                                                                                                                                                                                                                                                                                                                                                                                                                                                                                                                                                    | 10,512         |
| <b>#6</b>              | #5 AND prospective study OR cohort study (prospective study OR cohort study OR randomised controlled trial* OR randomised controlled clinical trial* OR randomised controlled study OR randomised controlled clinical study OR randomized controlled trial* OR randomized controlled clinical trial* OR randomized controlled stud* OR randomized controlled clinical stud* OR randomised-controlled trial* OR randomised-controlled clinical trial* OR randomised-controlled study OR randomised-controlled clinical study OR randomized-controlled trial* OR randomized-controlled clinical trial* OR randomized-controlled stud* OR randomized-controlled clinical stud*) | 1,615          |
| <b>#7</b>              | <b>#6 Refined for HUMAN STUDY</b>                                                                                                                                                                                                                                                                                                                                                                                                                                                                                                                                                                                                                                            | <b>1,532</b>   |
|                        |                                                                                                                                                                                                                                                                                                                                                                                                                                                                                                                                                                                                                                                                              |                |
| <b>Database</b>        | <b>WEB OF SCIENCE</b>                                                                                                                                                                                                                                                                                                                                                                                                                                                                                                                                                                                                                                                        |                |
| <b>Date</b>            | <b>02 12 22</b>                                                                                                                                                                                                                                                                                                                                                                                                                                                                                                                                                                                                                                                              |                |
| <b>Search strategy</b> |                                                                                                                                                                                                                                                                                                                                                                                                                                                                                                                                                                                                                                                                              | <b>Results</b> |
| <b>#1</b>              | (diet* OR eat* OR food* OR feed* OR meal* OR nutriment* or nutritional advice* OR nutritional therapy* OR nutritional support* OR nutritional intervention*)                                                                                                                                                                                                                                                                                                                                                                                                                                                                                                                 | 3,525,476      |
| <b>#2</b>              | pancreas OR pancreatic                                                                                                                                                                                                                                                                                                                                                                                                                                                                                                                                                                                                                                                       | 314,759        |
| <b>#3</b>              | (cancer* OR oncology OR tumour* OR tumor* OR malignan* OR carcinoma OR neoplasm*)                                                                                                                                                                                                                                                                                                                                                                                                                                                                                                                                                                                            | 4,395,053      |

|                 |                                                                                                                                                                                                                                                                                                                                                                                                                                                                                                                                                                                                                                                                                                                                                                                                                             |              |
|-----------------|-----------------------------------------------------------------------------------------------------------------------------------------------------------------------------------------------------------------------------------------------------------------------------------------------------------------------------------------------------------------------------------------------------------------------------------------------------------------------------------------------------------------------------------------------------------------------------------------------------------------------------------------------------------------------------------------------------------------------------------------------------------------------------------------------------------------------------|--------------|
| #4              | (prospective study OR cohort study OR randomised controlled trial* OR randomised controlled clinical trial* OR randomised controlled study OR randomised controlled clinical study OR randomized controlled trial* OR randomized controlled clinical trial* OR randomized controlled stud* OR randomized controlled clinical stud* OR randomised-controlled trial* OR randomised-controlled clinical trial* OR randomised-controlled study OR randomised-controlled clinical study OR randomized-controlled trial* OR randomized-controlled clinical trial* OR randomized-controlled stud* OR randomized-controlled clinical stud*)                                                                                                                                                                                         | 1,748,334    |
| #5              | <b>#1 AND #2 AND #3 AND #4</b>                                                                                                                                                                                                                                                                                                                                                                                                                                                                                                                                                                                                                                                                                                                                                                                              | <b>1,117</b> |
|                 |                                                                                                                                                                                                                                                                                                                                                                                                                                                                                                                                                                                                                                                                                                                                                                                                                             |              |
| Database        | EMBASE                                                                                                                                                                                                                                                                                                                                                                                                                                                                                                                                                                                                                                                                                                                                                                                                                      |              |
| Date            | 02 12 22                                                                                                                                                                                                                                                                                                                                                                                                                                                                                                                                                                                                                                                                                                                                                                                                                    |              |
| Search strategy |                                                                                                                                                                                                                                                                                                                                                                                                                                                                                                                                                                                                                                                                                                                                                                                                                             | Results      |
| #1              | cancer* OR oncology OR tumour* OR tumor* OR malignan* OR carcinoma OR neoplasm*                                                                                                                                                                                                                                                                                                                                                                                                                                                                                                                                                                                                                                                                                                                                             | 7,265,519    |
| #2              | pancreas OR pancreatic*                                                                                                                                                                                                                                                                                                                                                                                                                                                                                                                                                                                                                                                                                                                                                                                                     | 534,464      |
| #3              | diet* OR eat* OR food* OR feed* OR meal* OR nutriment* OR (nutritional AND advice*) OR (nutritional AND therapy*) OR (nutritional AND support*) OR (nutritional AND intervention*)                                                                                                                                                                                                                                                                                                                                                                                                                                                                                                                                                                                                                                          | 3,825,898    |
| #4              | prospective AND study OR (cohort AND study) OR (randomised AND controlled AND trial*) OR (randomised AND controlled AND clinical AND trial*) OR (randomised AND controlled AND study) OR (randomised AND controlled AND clinical AND study) OR (randomized AND controlled AND trial*) OR (randomized AND controlled AND clinical AND trial*) OR (randomized AND controlled AND stud*) OR (randomized AND controlled AND clinical AND stud*) OR ('randomised controlled' AND trial*) OR ('randomised controlled' AND clinical AND trial*) OR ('randomised controlled' AND study) OR ('randomised controlled' AND clinical AND study) OR ('randomized controlled' AND trial*) OR ('randomized controlled' AND clinical AND trial*) OR ('randomized controlled' AND stud*) OR ('randomized controlled' AND clinical AND stud*) | 3,783,679    |
| #5              | <b>#1 AND #2 AND #3 AND #4</b>                                                                                                                                                                                                                                                                                                                                                                                                                                                                                                                                                                                                                                                                                                                                                                                              | <b>3,055</b> |
